# Supplementary material
Source: PubMed Central journal article supplement (PMC9903775)
Supplement: mmc1.pdf [file mmc1.pdf]

**Cell Genomics, Volume 1**

**Supplemental information**

**Transcriptome-wide Cas13 guide RNA design  
for model organisms and viral RNA pathogens**

**Xinyi Guo, Jahan A. Rahman, Hans-Hermann Wessels, Alejandro Méndez-Mancilla, Daniel Haro, Xinru Chen, and Neville E. Sanjana**

**Figure S1**

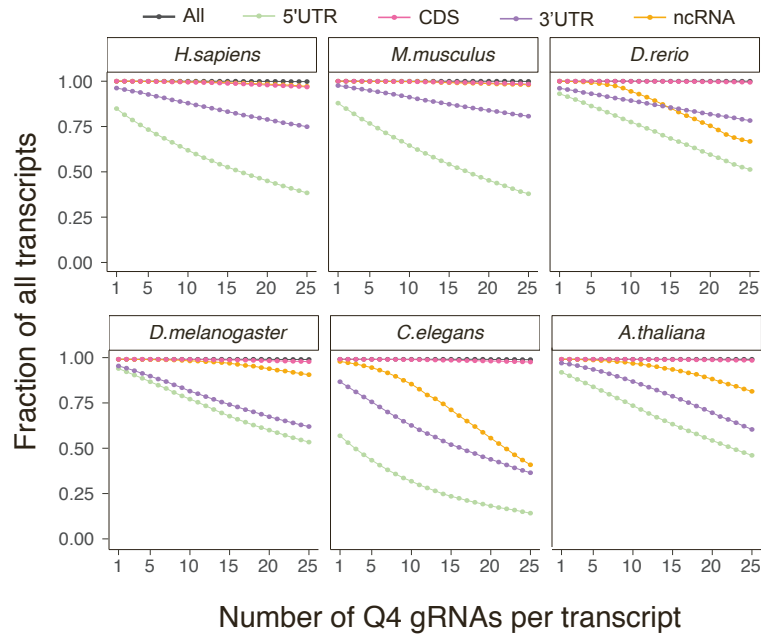

**Figure S1. Reference transcripts with Q4 gRNAs. Related to Figure 1.** The fraction of processed transcripts that contain at least 1 (up to 25) Q4 gRNAs (predicted high-scoring gRNAs) was calculated for each reference transcriptome.

**Figure S2**

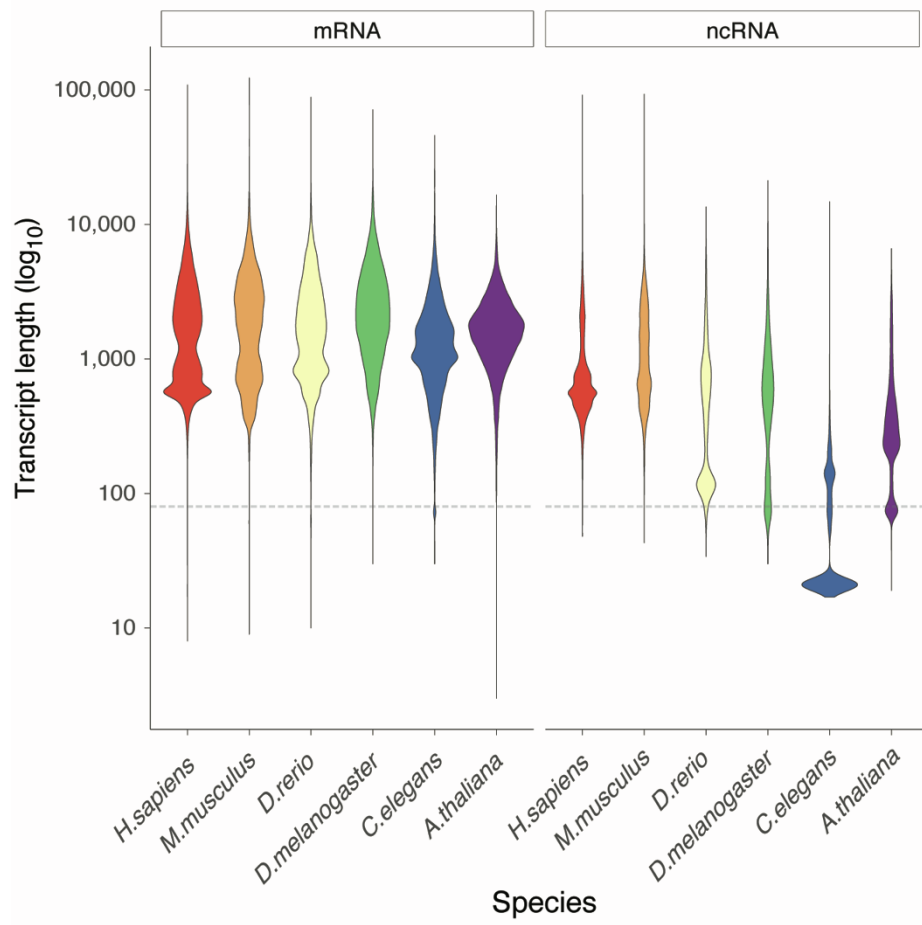

**Figure S2. Transcript length for mRNAs and ncRNAs across species. Related to Figure 1.**

Dotted line indicates the minimal input length requirements (> 80 bp) for Cas13d design software.

Transcript lengths were derived from corresponding gene annotation references.

**Figure S3**

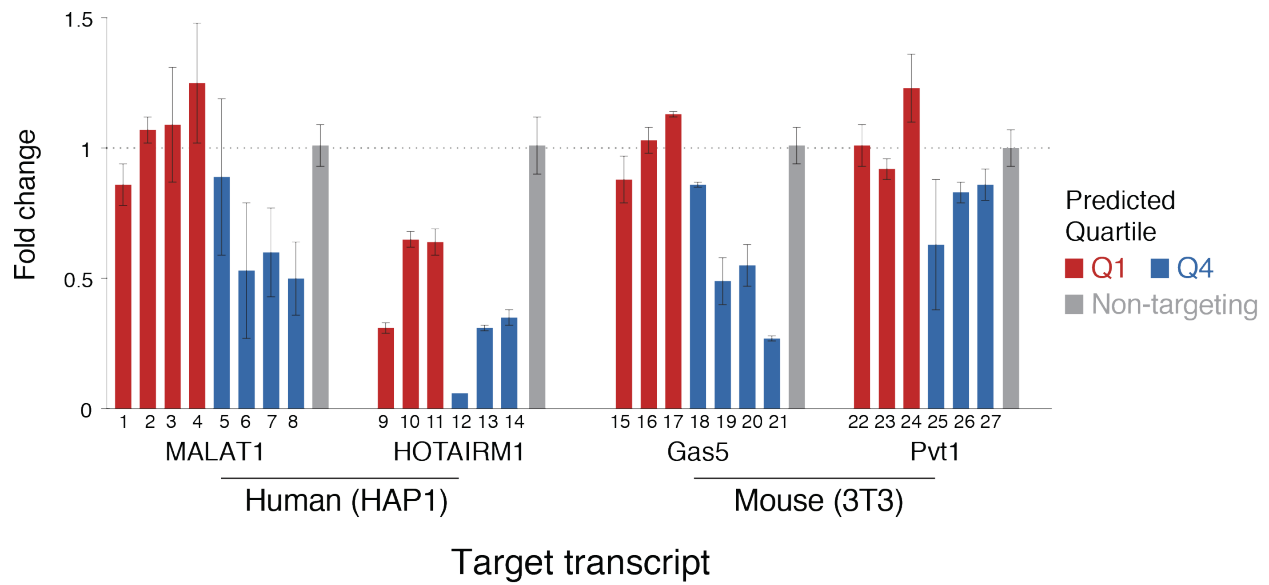

**Figure S3. Knockdown by individual Cas13 guide RNA for long non-coding RNAs (lncRNAs). Related to Figure 1.** For human and mouse lncRNA targets, we measured knockdown using at least 3 Q4 or Q1 gRNAs via lentiviral transduction and then, after 72 hours, quantitative PCR. Each column shown is an individual Cas13 guide RNA. Mean  $\pm$  s.e.m,  $n = 3$  transduction replicates.

Figure S4

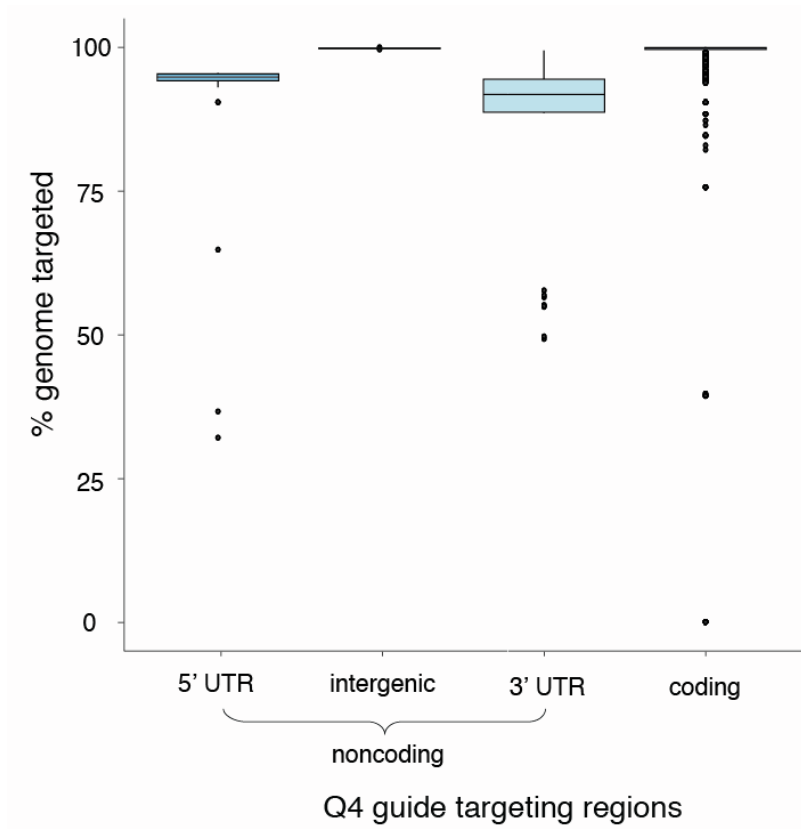

**Figure S4. Q4 gRNAs targeting coding SARS-CoV-2 regions versus noncoding SARS-CoV-2 regions. Related to Figure 2.** Classification of coding vs. noncoding regions was based on NCBI annotation of SARS-CoV-2 reference strain.

**Table S1. Comparison of Cas13 gRNA design webtools. Related to STAR Methods.**

|                                   | <b>Cas13design</b>                                                                | <b>CHOPCHOP v3</b>                                                                       | <b>CRISPR-RT</b>                                                                                                                    |
|-----------------------------------|-----------------------------------------------------------------------------------|------------------------------------------------------------------------------------------|-------------------------------------------------------------------------------------------------------------------------------------|
| Cas13 variant                     | <i>Rfx</i> Cas13d                                                                 | C2c2/Cas13a                                                                              | C2c2/Cas13a                                                                                                                         |
| On-target scores                  | Yes                                                                               | No                                                                                       | No                                                                                                                                  |
| Reference target transcript input | Can search with gene symbol, transcript ID, gene ID, or transcript type           | Can search with gene symbol and transcript ID                                            | FASTA only                                                                                                                          |
| Isoform usage                     | Per transcript                                                                    | Transcript or consensus                                                                  | Per transcript                                                                                                                      |
| Output gRNA display               | Interactive distribution of all gRNAs across the input transcript                 | Scrollable gene plot with all isoforms and a few gRNAs, plus link to UCSC genome browser | Graphical display is available per gRNAs                                                                                            |
| Organisms                         | 6 model organisms and 4 RNA viruses                                               | 2 model organisms                                                                        | 26 organisms                                                                                                                        |
| Off-target scores                 | Count per guide for up to 2 mismatches                                            | Count per guide for up to 3 mismatches                                                   | Count per guide for perfect match                                                                                                   |
| High-throughput design            | Command-line tool available                                                       | Command-line tool available                                                              | Not available                                                                                                                       |
| Website                           | <a href="https://cas13design.nygenome.org/">https://cas13design.nygenome.org/</a> | <a href="https://chopchop.cbu.uib.no/">https://chopchop.cbu.uib.no/</a>                  | <a href="http://bioinfolab.miamioh.edu/CRISPR-RT/interface/C2c2.php">http://bioinfolab.miamioh.edu/CRISPR-RT/interface/C2c2.php</a> |

**Table S2. lncRNA-targeting gRNA sequences and predicted scores. Related to Figure 1.**

| Species | Target gene     |    | gRNA sequence            | Score   | Quartile |
|---------|-----------------|----|--------------------------|---------|----------|
| Human   | <i>MALAT1</i>   | 1  | CCGGGCTTCTGCGTTGCTAAAAT  | 0.15249 | 1        |
| Human   | <i>MALAT1</i>   | 2  | GGGCCGTTGGCTGCCAGTGGCCC  | 0.15034 | 1        |
| Human   | <i>MALAT1</i>   | 3  | GTTCAGGGCTTTACTTTCCATTA  | 0.16100 | 1        |
| Human   | <i>MALAT1</i>   | 4  | AGTTCTTCGGTTAAAAATAGGTT  | 0.16123 | 1        |
| Human   | <i>MALAT1</i>   | 5  | GACAGCTAAGATAGCAGCACAAAC | 0.95725 | 4        |
| Human   | <i>MALAT1</i>   | 6  | GAAAACGCCTCAATCCCACACCA  | 0.82996 | 4        |
| Human   | <i>MALAT1</i>   | 7  | TTAGAAACGTGAAAACCCACTCT  | 0.79093 | 4        |
| Human   | <i>MALAT1</i>   | 8  | GATTAAAGTGTGATAGTTCAGGG  | 0.80126 | 4        |
| Human   | <i>HOTAIRM1</i> | 9  | AGGGCTGCGCAGCTCCTGGATGC  | 0.16104 | 1        |
| Human   | <i>HOTAIRM1</i> | 10 | ACTAAGTTATCAACAATTCATTT  | 0.15709 | 1        |
| Human   | <i>HOTAIRM1</i> | 11 | ATGAGTAACACGGAGTTTCTTTA  | 0.16042 | 1        |
| Human   | <i>HOTAIRM1</i> | 12 | AAAGAGATCAATTGCAGGAACAC  | 0.93766 | 4        |
| Human   | <i>HOTAIRM1</i> | 13 | AGGGCTGCGCAGCTCCTGGATGC  | 0.95672 | 4        |
| Human   | <i>HOTAIRM1</i> | 14 | ACAGTCTAAGATTTGGGCCAAGC  | 0.90240 | 4        |
| Mouse   | <i>Gas5</i>     | 15 | CCGGGCCGCGTCTGGGTTGCAGC  | 0.16049 | 1        |
| Mouse   | <i>Gas5</i>     | 16 | AATACACTTTAATGGTAAAATTT  | 0.15376 | 1        |
| Mouse   | <i>Gas5</i>     | 17 | TCATGTTATAATACACTTTAATG  | 0.15805 | 1        |
| Mouse   | <i>Gas5</i>     | 18 | CCCTCCCAGCACTCGGCGACCTT  | 0.78533 | 4        |
| Mouse   | <i>Gas5</i>     | 19 | TTTCAAACGTCTATCCAGCCTC   | 0.72260 | 4        |
| Mouse   | <i>Gas5</i>     | 20 | TCAGAAACAAAGGTGCAGTCACT  | 0.90981 | 4        |
| Mouse   | <i>Gas5</i>     | 21 | AACACAATATATCTGACACCATC  | 0.87841 | 4        |
| Mouse   | <i>Pvt1</i>     | 22 | TTACTTGGCATCTCTTAAGTCAA  | 0.15917 | 1        |
| Mouse   | <i>Pvt1</i>     | 23 | CATAGGCTCCATCCTTAATGTGC  | 0.15735 | 1        |
| Mouse   | <i>Pvt1</i>     | 24 | CGTAGGGCCACATTCAATGTAT   | 0.15424 | 1        |
| Mouse   | <i>Pvt1</i>     | 25 | TATCCACCAGAATTACTCCCCAG  | 0.84689 | 4        |
| Mouse   | <i>Pvt1</i>     | 26 | AGCACTTGTAACCTCCAAGCCAT  | 0.96328 | 4        |
| Mouse   | <i>Pvt1</i>     | 27 | TCAGAAAGTCAAATGTCCAAGG   | 0.93282 | 4        |
| -       | Non-targeting   |    | TTCTTCGGCTTAGACCAGTGCGG  | N/A     | N/A      |

**Table S3. qPCR primers for gene expression quantification. Related to Figure 1.**

| <b>Species</b> | <b>Target gene</b> | <b>Primer type</b> | <b>Primer sequence (5' to 3')</b> |
|----------------|--------------------|--------------------|-----------------------------------|
| Human          | <i>MALAT1</i>      | Forward            | GCTCTGTGGTGTGGGATTGA              |
| Human          | <i>MALAT1</i>      | Reverse            | GTGGCAAATGGCGGACTTT               |
| Human          | <i>HOTAIRM1</i>    | Forward            | TTAAATCAACCCGCCCCACA              |
| Human          | <i>HOTAIRM1</i>    | Reverse            | TCAACCCCTCCCCATAAA                |
| Human          | <i>GAPDH</i>       | Forward            | ACAAC TTTGGTATCGTGGAAGG           |
| Human          | <i>GAPDH</i>       | Reverse            | TATTTGGCAGGTTTTTCTAGACG           |
| Mouse          | <i>Gas5</i>        | Forward            | AGCTGGATAACAGAGCGAGC              |
| Mouse          | <i>Gas5</i>        | Reverse            | GCAGTGCCTTCACTTGAGGT              |
| Mouse          | <i>Pvt1</i>        | Forward            | GCTGGATCCACCCTCTTGTC              |
| Mouse          | <i>Pvt1</i>        | Reverse            | CCAGGCAAGCCAGGTGTAAT              |
| Mouse          | <i>Gapdh</i>       | Forward            | GGAGAGTGTTTCCTCGTCCC              |
| Mouse          | <i>Gapdh</i>       | Reverse            | ATGAAGGGGTCGTTGATGGC              |
